# Supplementary material for: Synergistically interactive MnFeM (M = Cu, Ti, and Co) sites doped porous g-C3N4 fiber-like nanostructures for an enhanced green hydrogen production
Source: Royal Society of Chemistry journal article supplement (doi:10.1039/d3gc01071f), 2023-01-01
Supplement: d3gc01071f1.pdf [file d3gc01071f1.pdf]

## Supporting information

### Synergistically Interactive MnFeM (M=Cu, Ti, and Co) Sites Porous g-C<sub>3</sub>N<sub>4</sub> Fiber-like Nanostructures for an Enhanced Green Hydrogen Production

Belal Salah<sup>a,b,†</sup>, Ahmed Abdelgawad<sup>a,b,†</sup>, Qingqing Lu<sup>c</sup>, Adewale K. Ipadeola<sup>a,b</sup>, Rafael Luque<sup>d,e</sup>, and Kamel Eid<sup>a\*</sup>

- Gas Processing Center, College of Engineering, Qatar University, Doha 2713, Qatar.*
- Center for advanced materials, Qatar University, Doha 2713, Qatar*
- Engineering & Technology Center of Electrochemistry, School of Chemistry and Chemical Engineering, Qilu University of Technology (Shandong Academy of Sciences), Jinan, China.*
- Peoples Friendship University of Russia (RUDN University), 6 Miklukho Maklaya str., 117198, Moscow, Russian Federation*
- Universidad ECOTEC, Km 13.5 Samborondón, Samborondón, EC092302, Ecuador.*

<sup>†</sup> Contributed equally to this work.

\*Corresponding author E-mail: kamel.eid@qu.edu.qa

## Experimental

### Chemicals and Materials

Copper (II) chloride ((CuCl<sub>2</sub>·2H<sub>2</sub>O), 99.99 %), cobalt (II) chloride ((CoCl<sub>2</sub>·2H<sub>2</sub>O), 99.99 %), (melamine, 99 %), manganese (II) chloride monohydrate (MnCl<sub>2</sub>·H<sub>2</sub>O), Iron (II) chloride tetrahydrate (FeCl<sub>2</sub>·4H<sub>2</sub>O), titanium (IV) isopropoxide Ti[OCH(CH<sub>3</sub>)<sub>2</sub>]<sub>4</sub>, ethanol solution ((CH<sub>3</sub>CH<sub>2</sub>-OH), 99.8 %), nitric acid ((HNO<sub>3</sub>), 70 %), and commercial Pt/C catalyst (10 wt.% Pt) were purchased from Sigma-Aldrich Chemie GmbH.

### Synthesis of MnFeCu/g-C<sub>3</sub>N<sub>4</sub>

Porous MnFeCu/g-C<sub>3</sub>N<sub>4</sub> fiber-like nanostructures were synthesized based on our previous report but with changing reaction parameters and conditions along with utilizing ultrasonic treatment<sup>1,2</sup>. This includes a dispersion of melamine (4 g) in an aqueous solution of ethanol (200 mL), MnCl<sub>2</sub>·2H<sub>2</sub>O (2mL, 10 mM), FeCl<sub>2</sub>·4H<sub>2</sub>O (2mL, 10 mM), and CuCl<sub>2</sub>·2H<sub>2</sub>O (2mL, 10 mM) via ultrasonic treatment for 10 min. This is followed by slow addition of 60 mL HNO<sub>3</sub> (0.1 M) and then left under magnetic stirring for 1 h. Finally, the obtained precipitate was filtrated and washed with ethanol/H<sub>2</sub>O (3/1 v/v) for 4 times and dried at 100 °C for 2 h. The obtained powder was annealed at 550 °C (10° /min, 5°/min heating rate) for 2 h under N<sub>2</sub>.

This method was also used to prepare porous MnFeTi/g-C<sub>3</sub>N<sub>4</sub> and MnFeCo/g-C<sub>3</sub>N<sub>4</sub> fiber-like nanostructures, but with the replacement of CuCl<sub>2</sub>·2H<sub>2</sub>O with Ti[OCH(CH<sub>3</sub>)<sub>2</sub>]<sub>4</sub> and CoCl<sub>2</sub>·2H<sub>2</sub>O, respectively.

Metal-free g-C<sub>3</sub>N<sub>4</sub> was formed using the same method, but without metal precursors.

### Materials Characterization

The scanning electron microscope ((SEM), Hitachi S-4800, Hitachi, Tokyo, Japan)) and the transmission electron microscope ((TEM), TecnaiG220, FEI, Hillsboro, OR, USA), equipped with high-angle annular dark-field scanning transmission electron microscopy (HAADF-SEM), and energy dispersive spectrometer (EDX) was used for investigation of the morphology and composition. The X-ray photoelectron spectroscopy (XPS) spectra were recorded on a Thermo ESCALAB 250 spectrometer, while the X-ray diffraction spectra were measured on an X-ray diffractometer (X'Pert-Pro MPD, PANalytical Co.). The inductively coupled plasma optical emission spectrometry (ICP-OES, Agilent 5800) was used for elemental composition.

### Electrochemical HER

The cyclic voltammogram (CVs), linear sweep voltammogram (LSV), electrochemical impedance spectroscopy (EIS), and chronoamperometry (CA) tests were measured on Gamry potentiostat (Reference 3000, Gamry Co., Warminster, PA, USA). This is using a three-electrode cell of Pt wire (3 mm) as a counter electrode, Ag/AgCl as a reference electrode, and glassy carbon electrode (GCE) (∅5 mm x 1 mm) as a working electrode. The GCE was initially polished with 0.3 and 0.05 μm of alumina slurry and then rinsed by double deionized H<sub>2</sub>O three times under sonication, followed by deposition the 10-20 μl catalyst ink (2mg/mL in isopropanol/H<sub>2</sub>O/Nafion (5 wt.%) (4/1/0.05 v/v/v) on the working electrodes through volumetric casting and then left to dry under vacuum at 80 °C. The metal loading (i.e. Pt or MnFeM) of each catalyst on the GCE was adjusted to 0.004 mg<sub>metal</sub>/cm<sup>2</sup> based on the ICP-OES data. The obtained HER currents were corrected against Ohmic potential drop, and the potentials were normalized to the reversible hydrogen electrode (RHE) using equation (Eqn. 1).

$$E_{\text{RHE}} = E_{\text{Ag/AgCl}} + 0.197 \text{ V} + 0.059 \times \text{pH} \text{ (Eqn. 1)}$$

The mass activity (MA) was calculated at 0.4V using the following equation (Eqn. 2)

$$MA = J_{\text{HER}}/M \quad (\text{Eqn. 2})$$

Where  $J_{\text{HER}}$  is the HER current density, and M is the metal (Pt or MnFeM) loading on the GCE.

The specific activity (SA) was calculated at 0.4V using the following equation (Eqn. 3)

$$SA = J_{\text{HER}}/M \times \text{ECSA} \quad (\text{Eqn. 3})$$

Where ECSA is the electrochemical active surface.

The turnover frequency (TOF) was calculated using the following equation (Eqn. 4)

$$\text{TOF} = (J_{\text{HER}} \times F) / (n \times A) \quad (\text{Eqn. 4})$$

Where F is the Faraday constant (96,485 C/mol), n is the number of electrons transferred per  $\text{H}_2$ , and A is the surface area of the catalyst.

**Table S1.** Comparison of the hydrogen production (electrocatalytic and/or photocatalytic) of carbon nitride-based nanostructured catalysts with literature

| Catalyst                                                                                                                    | Preparation Method                                                                                                        | Metal dopants      | Metal Loading (Wt.%)    | Morphology of CN                        | Catalytic reaction                                    | Electrolyte                   | HER rate ( $\mu\text{mol}\cdot\text{g}^{-1}\cdot\text{h}^{-1}$ ) /overpotential (mV) | Ref.      |
|-----------------------------------------------------------------------------------------------------------------------------|---------------------------------------------------------------------------------------------------------------------------|--------------------|-------------------------|-----------------------------------------|-------------------------------------------------------|-------------------------------|--------------------------------------------------------------------------------------|-----------|
| MnFeCu/gCN<br>MnFeTi/gCN<br>MnFeCo/gCN<br>MnFe/gCN<br>Mn/gCN                                                                | Protonation by $\text{HNO}_3$ (0.1 M, 60 mL) in ethanol (200 mL) under ultrasonic treatment and annealing (550 °C/2h)     | Mn, Fe, Cu, Ti, Co | 2.0 - 2.3               | Porous fiber-like                       | Electrocatalytic HER                                  | $\text{H}_2\text{SO}_4$       | 3774.35/ 400<br>1902.54/ 548<br>1820.10/ 564<br>2110.64/ 475<br>872.20/ 583          | This work |
| PtPd/CNs                                                                                                                    | Protonation by $\text{NaNO}_3$ (0.1 M) and HCl (0.1 M) in Ethylene glycol (15 mL) and annealing (550 °C/2h)               | Pt, Pd             | 1.5                     | Nanorods                                | Electrochemical and photoelectrochemical CO oxidation | -                             | -                                                                                    | 3         |
| Pd/CN NWs<br>Pd-Cu/CN-NWs                                                                                                   | Protonation by $\text{HNO}_3$ (0.2 M, 60 mL) in ethanol (30 mL) and annealing (400 °C/2h)                                 | Pd, Cu             | 1.2<br>0.6-0.6          | Nanowires<br>Nanowires                  | Thermal CO oxidation                                  | -                             | -                                                                                    | 4         |
| Au/Pd/gC <sub>3</sub> N <sub>4</sub> NTs                                                                                    | Protonation by $\text{HNO}_3$ (0.1 M, 70 mL) in ethylene glycol (30 mL) and annealing (450 °C/2h)                         | Pd, Au             | 0.5-0.5                 | Nanotubes                               | Thermal CO oxidation                                  | -                             | -                                                                                    | 5         |
| Pd/gC <sub>3</sub> N <sub>4</sub> NTs<br>Cu/gC <sub>3</sub> N <sub>4</sub> NTs<br>Pd/Cu/gC <sub>3</sub> N <sub>4</sub> -NTs | Protonation by $\text{HNO}_3$ (0.1 M 60 mL) in Ethylene glycol (30 mL) and annealing (550 °C/2h)                          | Pd, Cu             | 1.1<br>1.1<br>0.55-0.55 | Nanotubes<br>Nanotubes<br>Nanotubes     | Thermal CO oxidation                                  | -                             | -                                                                                    | 2         |
| Pd/gC <sub>3</sub> N <sub>4</sub> NFs<br>Au/gC <sub>3</sub> N <sub>4</sub> NFs<br>Au/Pd/gC <sub>3</sub> N <sub>4</sub> NFs  | Protonation by $\text{HNO}_3$ (0.3 M, 60 mL) in isopropanol (30 mL) and annealing (480 °C/2h)                             | Pd, Au             | 1<br>1<br>0.5-0.5       | Nanofibers<br>Nanofibers<br>Nanofibers  | Thermal CO oxidation                                  | -                             | -                                                                                    | 1         |
| Cu/P-g-C <sub>3</sub> N <sub>4</sub>                                                                                        | Protonation of Melamine and pyridine by $\text{HNO}_3$ (0.2 M, 20 mL) in 1,2-ethanediol (50 mL) and annealing (550 °C/2h) | Cu                 | 1.8                     | hierarchical porous crumpled nanosheets | Thermal CO oxidation                                  | -                             | -                                                                                    | 6         |
| Cu/g-C <sub>3</sub> N <sub>4</sub><br>Mn/g-C <sub>3</sub> N <sub>4</sub><br>Fe/g-C <sub>3</sub> N <sub>4</sub>              | Protonation by $\text{HNO}_3$ (0.1 M, 20 mL) in ethanol (100 mL) and annealing at (550                                    | Cu, Mn, Fe         | 1.7 ±0.2                | Fiber-like                              | Electrochemical HER                                   | 0.5 M $\text{H}_2\text{SO}_4$ | 222.15/ 449<br>91.15/ 610<br>110.80/ 560                                             | 7         |

|                                                                                         |                                                                                                                                                                                                                                                                                            |            |         |                             |                          |                                                                 |                                                    |    |
|-----------------------------------------------------------------------------------------|--------------------------------------------------------------------------------------------------------------------------------------------------------------------------------------------------------------------------------------------------------------------------------------------|------------|---------|-----------------------------|--------------------------|-----------------------------------------------------------------|----------------------------------------------------|----|
|                                                                                         | °C/2h)                                                                                                                                                                                                                                                                                     |            |         |                             |                          |                                                                 |                                                    |    |
| Pt/CCTs                                                                                 | Sonication, freeze-drying, and calcined (550 °C/3h)                                                                                                                                                                                                                                        | Pt         | 3       | Nanotubes                   | Photocatalytic HER       | 0.2 M Na <sub>2</sub> SO <sub>4</sub> + TEOA                    | 3538.30/-                                          | 8  |
| Pt/HR-CN                                                                                | Nanocasting template, calcined (550 °C/4h) and etching, Pt/HR-CN by in-situ photodeposition of Pt                                                                                                                                                                                          | Pt         | 3       | Helical nanorods            | Photocatalytic HER       | 0.01 M AgNO <sub>3</sub> + TEOA + acetonitrile                  | 74 μmol/h/ -                                       | 9  |
| Pt/CN-MU                                                                                | Thermal condensation of melamine and urea (1:10) (400 °C/4h) then annealing at 550 °C for 4h                                                                                                                                                                                               | Pt         | 0.5     | Holey nanotubes             | Photocatalytic HER       | 0.5 M Na <sub>2</sub> SO <sub>4</sub> + 20 vol.% lactic acid    | 1073.60/ -                                         | 10 |
| TiO <sub>2</sub> /g-CN                                                                  | TiO <sub>2</sub> by hydrothermal at (150 °C/4h) and calcination (500 °C/1hr) then TiO <sub>2</sub> /g-CN by solvothermal (180 °C/24h) and calcination (520 °C/1h)                                                                                                                          | Ti         | -       | Nanorod arrays              | Photoelectrochemical HER | 0.2 M Na <sub>2</sub> SO <sub>4</sub>                           | - / 160                                            | 11 |
| TiO <sub>2</sub> /P-C <sub>3</sub> N <sub>4</sub> /Co <sub>3</sub> O <sub>4</sub>       | TiO <sub>2</sub> by hydrothermal (180 °C/4h), impregnated in cyanuric acid and diammonium hydrogen phosphate solution, calcination(550 °C/2h), immersed in Co solution reduced by NaOH, calcination (350 °C/3h)                                                                            | Co, Ti     | -       | Nano dot Core-nanorod shell | Photoelectrochemical HER | 0.5 M Na <sub>2</sub> SO <sub>4</sub>                           | 26.16 μmol·cm <sup>-1</sup> ·h <sup>-1</sup> / 920 | 12 |
| MoS <sub>2</sub> /g-C <sub>3</sub> N <sub>4</sub>                                       | g-C <sub>3</sub> N <sub>4</sub> by Hydrothermal/calcination (180/4hr, 600 °C/4h), MoS <sub>2</sub> by hydrothermal (200 °C/24h), and MoS <sub>2</sub> /g-C <sub>3</sub> N <sub>4</sub> by mixed impregnation                                                                               | Mo         | 10-30   | Nanoflake/nanotube          | Photocatalytic HER       | 0.5 M Na <sub>2</sub> SO <sub>4</sub>                           | 1124.00/ -                                         | 13 |
| PtNi/g-C <sub>3</sub> N <sub>4</sub>                                                    | g-C <sub>3</sub> N <sub>4</sub> by calcination (600 °C/3h) and PtNi/g-C <sub>3</sub> N <sub>4</sub> by co-reduction using NaBH <sub>4</sub> (0.05 M)                                                                                                                                       | Pt, Ni     | 0.99    | Nanotubes                   | Photocatalytic HER       | 0.2 M Na <sub>2</sub> SO <sub>4</sub>                           | 104.8 μmol h <sup>-1</sup> / -                     | 14 |
| Ni <sub>2</sub> P-Cd <sub>0.9</sub> Zn <sub>0.1</sub> S/g-C <sub>3</sub> N <sub>4</sub> | Ni <sub>2</sub> P-Cd <sub>0.9</sub> Zn <sub>0.1</sub> S by two-step Hydrothermal (220 °C/24hr, 200 °C/24h), g-C <sub>3</sub> N <sub>4</sub> by calcination(550 °C/4h) and Ni <sub>2</sub> P-Cd <sub>0.9</sub> Zn <sub>0.1</sub> S/g-C <sub>3</sub> N <sub>4</sub> by self-assembly for 24h | Ni, Cd, Zn | 0.5-6.0 | Nanorods                    | Photocatalytic HER       | 0.15 M Na <sub>2</sub> S + 0.05 Na <sub>2</sub> SO <sub>4</sub> | 121.20 μmol mg <sup>-1</sup> h <sup>-1</sup> /-    | 15 |
| 1D-RuO <sub>2</sub> -CN <sub>x</sub>                                                    | CN <sub>x</sub> by Microwave irradiation(180 °C/3h), and 1D-RuO <sub>2</sub> -CN <sub>x</sub> by hydrothermal reduction by (NaBH <sub>4</sub> /120 °C/8h), then hydrothermal treatment (350 °C/12h)                                                                                        | Ru         | 24.41   | Nanowires                   | Electrocatalytic HER     | 0.5 M H <sub>2</sub> SO <sub>4</sub><br>0.5 M KOH               | - / 93<br>- / 95                                   | 16 |
| g-C <sub>3</sub> N <sub>4</sub> nanoribbon-G                                            | GO by Hummers method, g-C <sub>3</sub> N <sub>4</sub> by calcination (600 °C/2h), and chemically treated/ g-C <sub>3</sub> N <sub>4</sub> nanoribbon-G by Hydrothermal treatment (180 °C/6h)                                                                                               | -          | -       | Nanoribbon                  | Electrocatalytic HER     | 0.5 M H <sub>2</sub> SO <sub>4</sub>                            | -/ 207                                             | 17 |

|                                               |                                                                                                                                                                                                    |            |           |                         |                    |                                                                      |                                 |    |
|-----------------------------------------------|----------------------------------------------------------------------------------------------------------------------------------------------------------------------------------------------------|------------|-----------|-------------------------|--------------------|----------------------------------------------------------------------|---------------------------------|----|
| PtCo/Na <sub>0.1</sub> SC NNT                 | Na <sub>0.1</sub> SCNNT by precursor mixing, grinding, and thermal polymerization / PtCo/Na <sub>0.1</sub> SCNNT by chemical reduction                                                             | Pt, Co, Na | 1.38-2.38 | Nanotubes               | Photocatalytic HER | 0.2 M Na <sub>2</sub> SO <sub>4</sub> + 10 vol.% TEOA                | 254.70 μmol h <sup>-1</sup>     | 18 |
| T-CN                                          | Annealing (450 °C/4h) Mixture of Melamine with (KCl, LiCl) molten salt assisted                                                                                                                    | Pt         | 3         | Hollow tubes            | Photocatalytic HER | 0.1 M Na <sub>2</sub> SO <sub>4</sub> + 10 vol.% TEOA                | 332.00/ -                       | 19 |
| TCN-0.1                                       | Thermal polymerization (Urea, MF resin mixture) (600 °C/3h)                                                                                                                                        | Pt         | 3         | Multistage tubular      | Photocatalytic HER | 0.2 M Na <sub>2</sub> SO <sub>4</sub> + 10 vol.% TEOA                | 7505.00/ -                      | 20 |
| g-CNNTs(540)                                  | Unidirectional freezing of urea, annealing at (540 °C/2h)                                                                                                                                          | Pt         | 3         | Hollow tubes            | Photocatalytic HER | 0.2 M Na <sub>2</sub> SO <sub>4</sub> + 10 vol.% TEOA                | 8789/-                          | 21 |
| CN-10                                         | Solvothermal polymerization (180 °C/12h) and calcination (550 °C/4h)                                                                                                                               | Pt         | 3         | Spongelike fibers       | Photocatalytic HER | 0.5 M Na <sub>2</sub> SO <sub>4</sub> + 10 vol.% TEOA                | 2227.00/ -                      | 22 |
| R-TCNT                                        | Hydrothermal of spherical melamine (180 °C/8h) and annealing (500 °C/4h)                                                                                                                           | -          | -         | Bunchy microtubes       | Photocatalytic HER | 0.5 M Na <sub>2</sub> SO <sub>4</sub> + 10 vol.% TEOA                | 8.19 μmol h <sup>-1</sup> / -   | 23 |
| P-TCN/GQDs-0.15                               | P-TCN by hydrothermal and calcination (180 °C/4h, 500 °C/10h), and P-TCN/GQDs by Lyophilization method                                                                                             | -          | -         | Hexagonal Tubular       | Photocatalytic HER | 0.1 M Na <sub>2</sub> SO <sub>4</sub>                                | 112.10 μmol h <sup>-1</sup> / - | 24 |
| Pt/PCNC                                       | Two-step (Hydrothermal self-assembly/ Self-template, 200 °C/12h) pyrolysis(550 °C/3h)                                                                                                              | Pt         | 3         | Coral-like architecture | Photocatalytic HER | 0.1 M Na <sub>2</sub> SO <sub>4</sub> + 10 vol.% TEOA                | 5289.90/ -                      | 25 |
| Pt/P-TCN                                      | Hydrothermal (180 °C/10h) and heat treatment (500 °C/4h), and Pt/P-TCN in-situ photodeposition of pt precursor                                                                                     | Pt         | 1         | Rod-like                | Photocatalytic HER | 0.1 M Na <sub>2</sub> SO <sub>4</sub>                                | 67.00 μmol h <sup>-1</sup> / -  | 26 |
| Pt/g-C <sub>3</sub> N <sub>4</sub>            | Hydrothermal (200 °C/12h) and pyrolysis (550 °C/4h) and Pt/g-C <sub>3</sub> N <sub>4</sub> in-situ photodeposition of pt precursor                                                                 | Pt         | 3         | Nanotubes               | Photocatalytic HER | 10 vol.% TEOA                                                        | 118.50 μmol h <sup>-1</sup> / - | 27 |
| Pt/CN-OA-0.03                                 | CN-OA-0.03 by facial wet chemistry and annealing (550 °C/2h) and Pt/CN-OA-0.03 by in-situ photodeposition of pt precursor                                                                          | Pt         | 3         | Nanotubes               | Photocatalytic HER | 10 vol.% TEOA                                                        | 12.60 μmol h <sup>-1</sup> / -  | 28 |
| Ag-Cu(3)C <sub>3</sub> N <sub>4</sub> NTs 1:1 | C <sub>3</sub> N <sub>4</sub> by multistep (calcination (550 °C/2h), exfoliation, heating 350 °C, rapid cooling in ice) and Ag-Cu(3)C <sub>3</sub> N <sub>4</sub> NTs by metals chemical reduction | Ag, Cu     | 3-5       | Nanotubes               | Photocatalytic HER | 0.01 M Na <sub>2</sub> SO <sub>4</sub> + 10 vol.% TEA, TEOA and MeOH | 738.00 μmol g <sup>-1</sup> / - | 29 |
| Pt/CNS-550                                    | Calcination (550 °C/2h), Recrystallization in acidic(H <sub>2</sub> SO <sub>4</sub> /methanol mixture)                                                                                             | Pt         | 3         | Nanotubes               | Photocatalytic HER | 0.1 M Na <sub>2</sub> SO <sub>4</sub> + 10 vol.%                     | 261.80 μmol h <sup>-1</sup> / - | 30 |

|                                                                         |                                                                                                                                                                                        |            |          |                                   |                      |                                                        |                                |               |
|-------------------------------------------------------------------------|----------------------------------------------------------------------------------------------------------------------------------------------------------------------------------------|------------|----------|-----------------------------------|----------------------|--------------------------------------------------------|--------------------------------|---------------|
|                                                                         | and annealing (550 °C/2h) and Pt/CNS-550 by in-situ photodeposition of pt precursor                                                                                                    |            |          |                                   |                      | TEOA                                                   |                                |               |
| Ba-P-CN                                                                 | Hydrothermal (180 °C/10h) and calcination (500 °C/4h)                                                                                                                                  | Pt         | 3        | Microtube                         | Photocatalytic HER   | 0.25 M Na <sub>2</sub> SO <sub>4</sub> + 17 vol.% TEOA | 12.30 μmol h <sup>-1</sup> / - | <sup>31</sup> |
| Pt/GCN-THP                                                              | calcination (550 °C/4h, (Ar, CCl <sub>4</sub> )), then LP-CNP rinsed by water and calcenied (500 °C/2h)                                                                                | Pt         | 3        | Tetragonal hollow prism           | Photocatalytic HER   | 0.5 M Na <sub>2</sub> SO <sub>4</sub> + 10 vol.% TEOA  | 1990.00/ -                     | <sup>32</sup> |
| Pt/CN-SP                                                                | Hydrothermal (180 °C/10h) and annealing (500 °C/4h)                                                                                                                                    | Pt         | 1        | Hexagonal tube stacked nanosheets | Photocatalytic HER   | 0.2 M Na <sub>2</sub> SO <sub>4</sub> + MeOH           | 57.00 μmol h <sup>-1</sup> / - | <sup>33</sup> |
| Pt/3wt%NaCl-CN                                                          | hydrothermal (200 °C/12h) and Thermal condensation (550 °C/2h) and Pt by in-situ photo-deposition                                                                                      | Pt         | 1        | Nanowires                         | Photocatalytic HER   | 0.25 M Na <sub>2</sub> SO <sub>4</sub> + 17 vol.% TEOA | 4.95 μmol h <sup>-1</sup> / -  | <sup>34</sup> |
| Pt/I/N-CN                                                               | Hydrothermal (180 °C/10h) and annealing (500 °C/4h) and Pt loaded by photodeposition                                                                                                   | Pt         | 3        | nanotubes                         | Photocatalytic HER   | 0.5 M Na <sub>2</sub> SO <sub>4</sub> + 17 vol.% TEOA  | 9.75 μmol h <sup>-1</sup> / -  | <sup>35</sup> |
| Pt/MCN                                                                  | halloysite as templet annealed (850 °C/2h) and activated by HCl (80 °C/6h), then melamine deposited on activated halloysite by vapor deposition (520 °C/4h), then templet etched by HF | Pt         | 3        | Wormlike nanorods                 | Photocatalytic HER   | 10 vol.% TEOA                                          | 633.00/ -                      | <sup>36</sup> |
| HGCNF/SNG/MoS <sub>2</sub>                                              | Electrospinning and sintering method at (580 °C/ 4h) followed by autoclave for hydrothermal treatment at                                                                               | Mo         | 10.26    | Hollow nanofibers                 | Electrocatalytic HER | 0.5 M H <sub>2</sub> SO <sub>4</sub>                   | - / 282                        | <sup>37</sup> |
| Pt(3.0wt%)M <sub>o</sub> <sub>2</sub> C/g-C <sub>3</sub> N <sub>4</sub> | freeze-dried (-50 °C/48h) then annealed (800 °C/ 4 h)                                                                                                                                  | Pt, Mo     | 4        | Rod-like                          | Photocatalytic HER   | 0.5 M Na <sub>2</sub> SO <sub>4</sub> + 10 vol.% TEOA  | 507.00/ -                      | <sup>38</sup> |
| Pt/O-g-C <sub>3</sub> N <sub>4</sub>                                    | Thermal condensation (500 °C/2h) and Pt loaded by photodeposition                                                                                                                      | Pt         | 3        | Nanorods                          | Photocatalytic HER   | 0.5 M Na <sub>2</sub> SO <sub>4</sub> + 15 vol.% TEOA  | 732.00/ -                      | <sup>39</sup> |
| Rh/77CNNb                                                               | Molten salt and thermal condensation (520 °C/4hr)                                                                                                                                      | Rh, Sr, Nb | 0.91-1.8 | Nanorods                          | Photocatalytic HER   | -                                                      | 0.183 h <sup>-1</sup> / -      | <sup>40</sup> |

Carbon quantum dots implanted g-C<sub>3</sub>N<sub>4</sub> nanotubes (CCTs); g-C<sub>3</sub>N<sub>4</sub> with a helical rod-like morphology (HR-CN); CN from melamine and urea in a 1:1 (CN-MU); carbon nitride nanotube (CNNT); triethanolamine (TEOA); Bundle thins carbon nitride tubes (R-TCNT); tubular carbon nitride (TCN), graphene quantum dot (GQD); porous bionic coral-like architecture (PCNC); phosphorus-doped hexagonal tubular carbon nitride (P-TCN); triethylamine (TEA); graphitic carbon nitride tetragonal hollow prism (GCN-THP); methanol (MeOH); C<sub>3</sub>N<sub>4</sub>- modified sodium pyrophosphate (CN-SP); mesoporous g-C<sub>3</sub>N<sub>4</sub> nanotubes (MCN); hollow g-C<sub>3</sub>N<sub>4</sub> nanofibers (HGCNF); sulfur/nitrogen-doped graphene (SNG); g-C<sub>3</sub>N<sub>4</sub>/Sr2K<sub>2</sub>Nb<sub>5</sub>O<sub>15</sub> with 77 wt.% of g-C<sub>3</sub>N<sub>4</sub> (77CNNb)

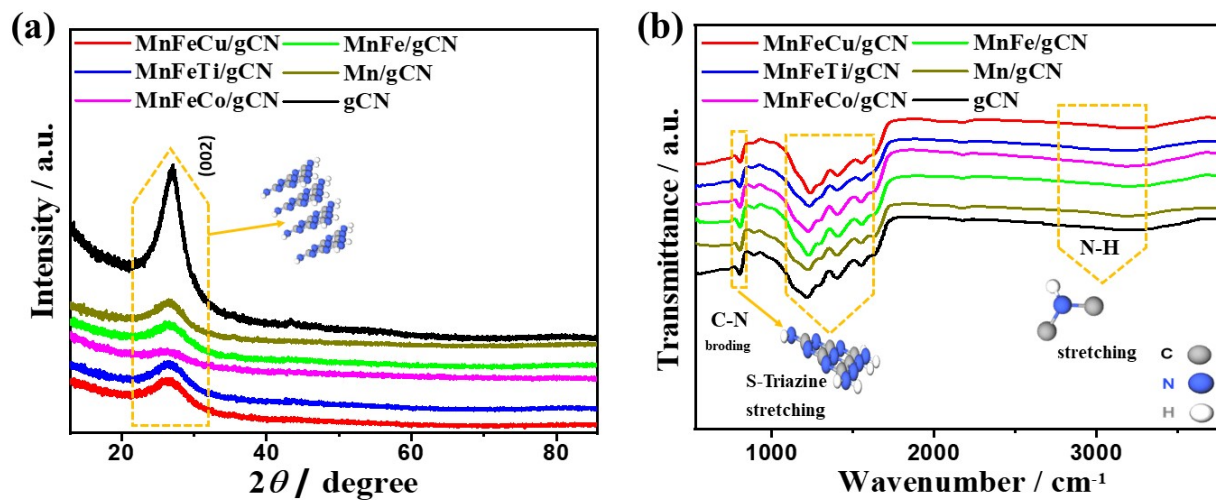

Figure S1. (a) XRD analysis and (b) FTIR spectra of thus obtained materials

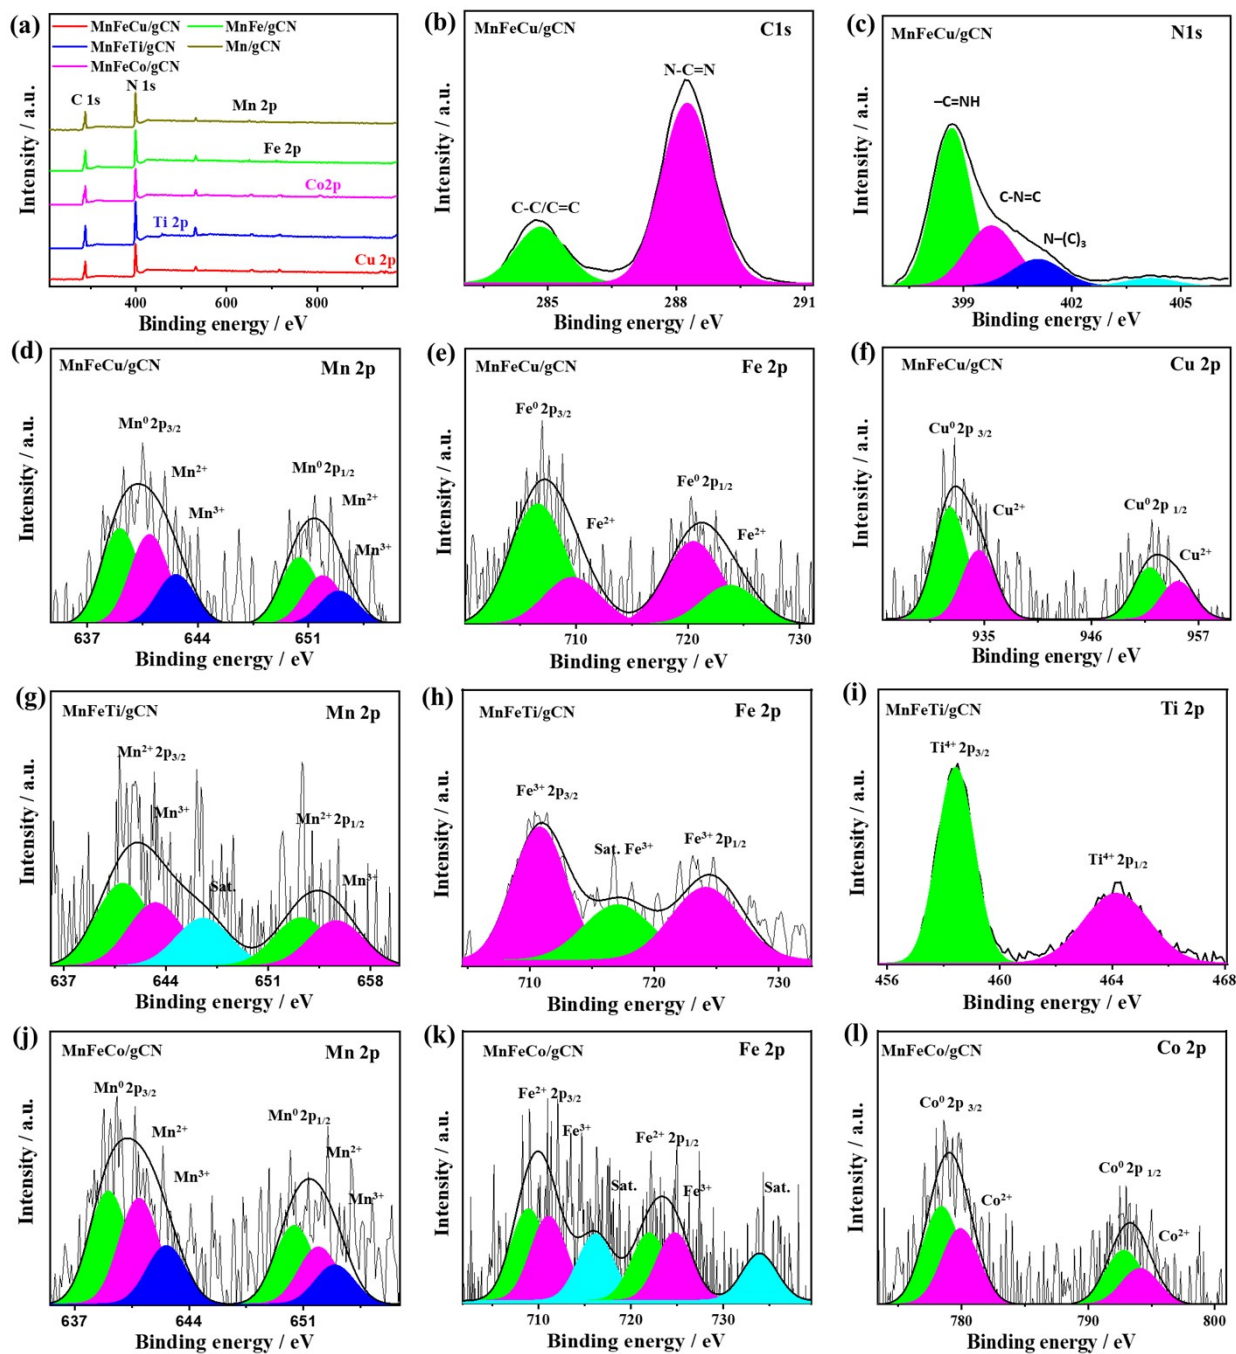

**Figure 2.** (a) XPS survey. High-resolution spectra of (b) C 1s, (c) N 1s of MnFeCu/g- $C_3N_4$ . High-resolution spectra of Mn 2p, Fe 2p, and Cu 2p of (d-f) MnFeCu/g- $C_3N_4$ , Mn 2p, Fe 2p, and Ti 2p of (g-i) MnFeTi/g- $C_3N_4$ , and Mn 2p, Fe 2p, and Cu 2p of (j-l) MnFeCo/g- $C_3N_4$

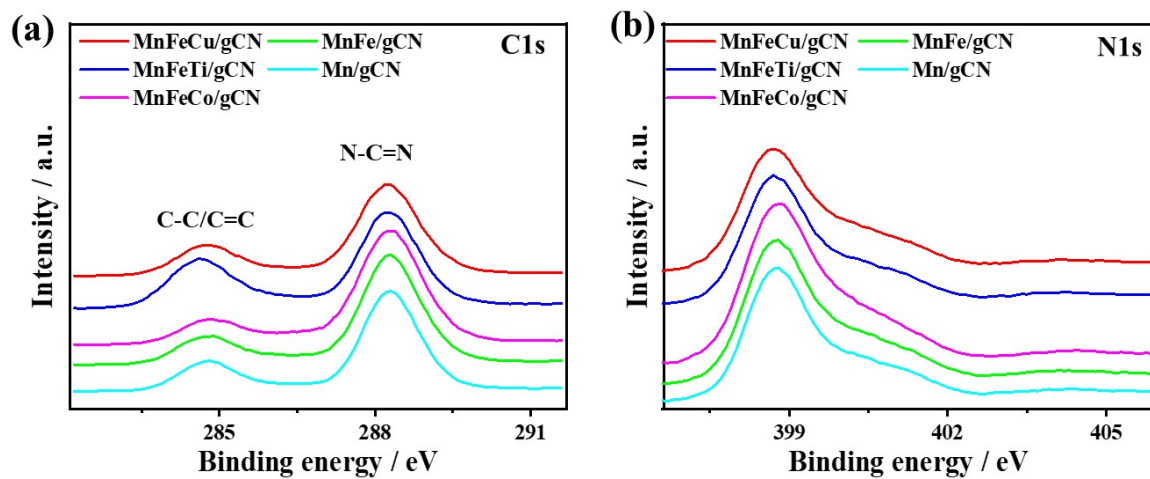

Figure S3. High-resolution XPS of (a) C1s (b) N1s.



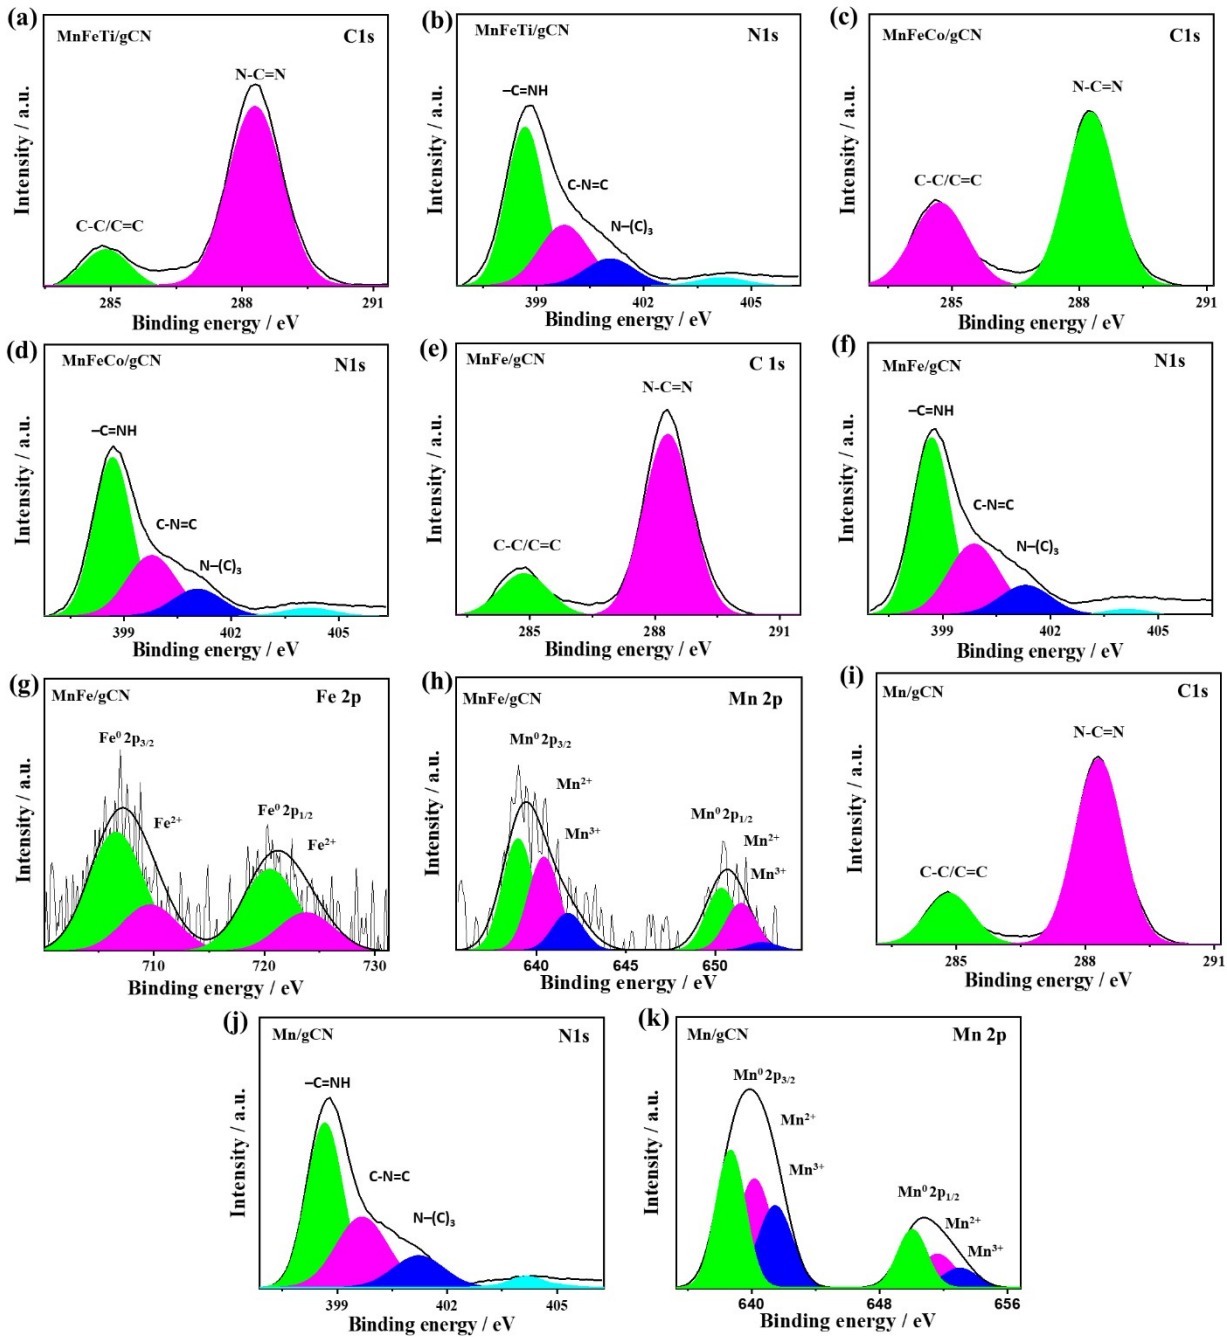

**Figure S4.** High-resolution XPS fitting of C 1s, N 1s (a-b) MnFeTi-gC<sub>3</sub>N<sub>4</sub>, (c-d) MnFeCo-gC<sub>3</sub>N<sub>4</sub>. (e-h) High-resolution XPS fitting of C 1s, N 1s, Mn 2p, and Fe 2p for MnFe-gC<sub>3</sub>N<sub>4</sub>. (e-h) High-resolution XPS fitting of C 1s, N 1s, and Mn 2p for Mn-gC<sub>3</sub>N<sub>4</sub>.

**Table S2** Composition analysis of the as-formed materials.

| catalyst                              | EDX (at.%) |      |      |       |      | ICP-OES (at.%) |      |      |       |       | XPS (at.%) |      |      |       |       |
|---------------------------------------|------------|------|------|-------|------|----------------|------|------|-------|-------|------------|------|------|-------|-------|
|                                       | Mn         | Fe   | M    | C     | N    | Mn             | Fe   | M    | C     | N     | Mn         | Fe   | M    | C     | N     |
| MnFeCu-gC <sub>3</sub> N <sub>4</sub> | 0.65       | 0.61 | 0.74 | 41    | 57   | 0.55           | 0.49 | 0.7  | 41.16 | 57.1  | 0.55       | 0.51 | 0.64 | 41.2  | 57.1  |
| MnFeTi-gC <sub>3</sub> N <sub>4</sub> | 0.47       | 0.83 | 0.94 | 40.53 | 57.5 | 0.45           | 0.75 | 0.78 | 40.51 | 57.51 | 0.43       | 0.7  | 0.77 | 40.56 | 57.54 |
| MnFeCo-gC <sub>3</sub> N <sub>4</sub> | 0.72       | 0.8  | 0.77 | 40.41 | 57.3 | 0.64           | 0.72 | 0.69 | 40.61 | 57.34 | 0.62       | 0.71 | 0.67 | 40.61 | 57.39 |

|                                     |      |      |   |       |       |      |      |   |       |       |      |      |   |       |       |
|-------------------------------------|------|------|---|-------|-------|------|------|---|-------|-------|------|------|---|-------|-------|
| MnFe-gC <sub>3</sub> N <sub>4</sub> | 0.59 | 0.67 | - | 41.32 | 57.42 | 0.65 | 0.75 | - | 41.26 | 57.34 | 0.63 | 0.72 | - | 41.27 | 57.38 |
| Mn-gC <sub>3</sub> N <sub>4</sub>   | 1.7  | -    | - | 41.4  | 56.9  | 1.58 | -    | - | 41.58 | 56.84 | 1.52 | -    | - | 41.58 | 56.9  |

**Table S3** The valance state and binding energies of the as-formed materials

| Elements                                   | Mn <sup>0</sup> 2p (eV)      |                              | Fe <sup>0</sup> 2P (eV)       |                              | Cu <sup>0</sup> 2p (eV) |        | Ti <sup>0</sup> 2p (eV)       |                               | Co <sup>0</sup> 2P (eV) |        |
|--------------------------------------------|------------------------------|------------------------------|-------------------------------|------------------------------|-------------------------|--------|-------------------------------|-------------------------------|-------------------------|--------|
|                                            | 2p 3/2                       | 2p 1/2                       | 2p 3/2                        | 2p 1/2                       | 2p 3/2                  | 2p 1/2 | 2p 3/2                        | 2p 1/2                        | 2p 3/2                  | 2p 1/2 |
| <b>MnFeCo/g-C<sub>3</sub>N<sub>4</sub></b> | 639.06                       | 650.50                       | 706.96                        | 720.53                       | 931.43                  | 951.94 | -                             | -                             | -                       | -      |
| <b>MnFeTi/g-C<sub>3</sub>N<sub>4</sub></b> | 641.1<br>(Mn <sup>2+</sup> ) | 653.2<br>(Mn <sup>2+</sup> ) | 710.76<br>(Fe <sup>3+</sup> ) | 724.1<br>(Fe <sup>3+</sup> ) | -                       | -      | 458.43<br>(Ti <sup>4+</sup> ) | 464.13<br>(Ti <sup>4+</sup> ) | -                       | -      |
| <b>MnFeTi/g-C<sub>3</sub>N<sub>4</sub></b> | 639.09                       | 650.43                       | 708.8<br>(Fe <sup>2+</sup> )  | 721.9<br>(Fe <sup>2+</sup> ) | -                       | -      | -                             | -                             | 778.32                  | 792.83 |
| <b>MnFe/g-C<sub>3</sub>N<sub>4</sub></b>   | 638.97                       | 650.29                       | 706.59                        | 720.46                       | -                       | -      | -                             | -                             | -                       | -      |
| <b>Mn/g-C<sub>3</sub>N<sub>4</sub></b>     | 638.71                       | 650.04                       |                               |                              | -                       | -      | -                             | -                             | -                       | -      |

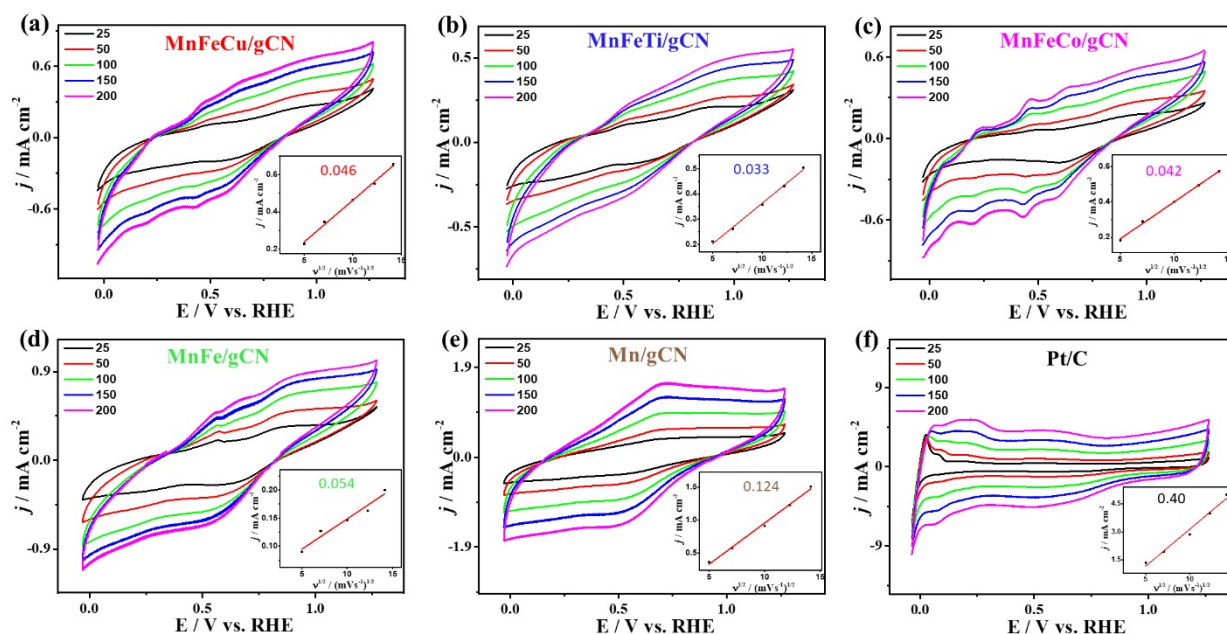

**Figure S5.** CV curves measured on the as-obtained catalysts at different scan rates and their related plots of  $j$  vs.  $v^{1/2}$  in 0.5 M H<sub>2</sub>SO<sub>4</sub>

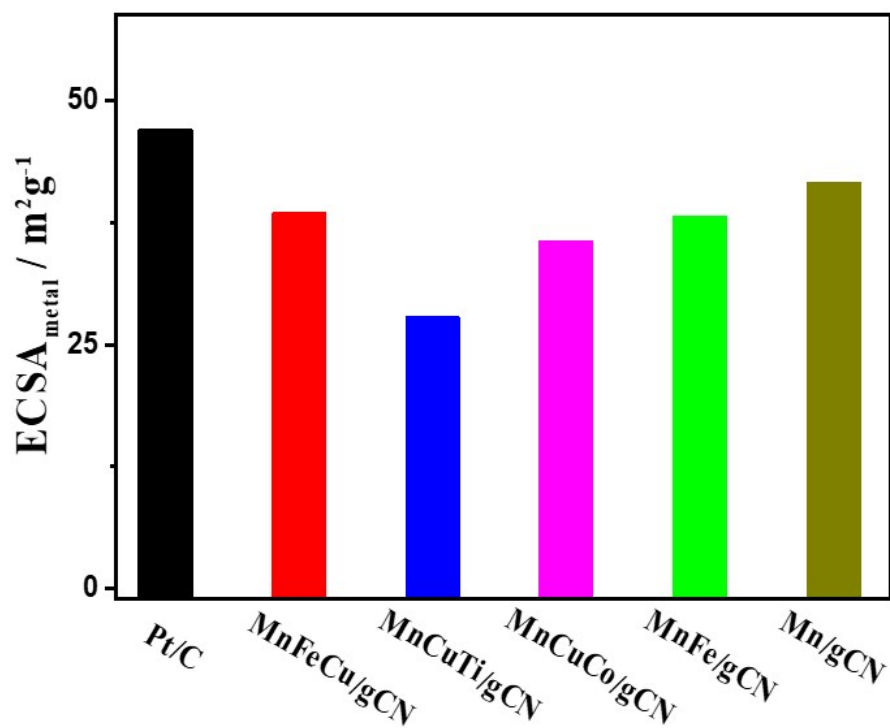

Figure S6. ECSA of the as-formed materials.

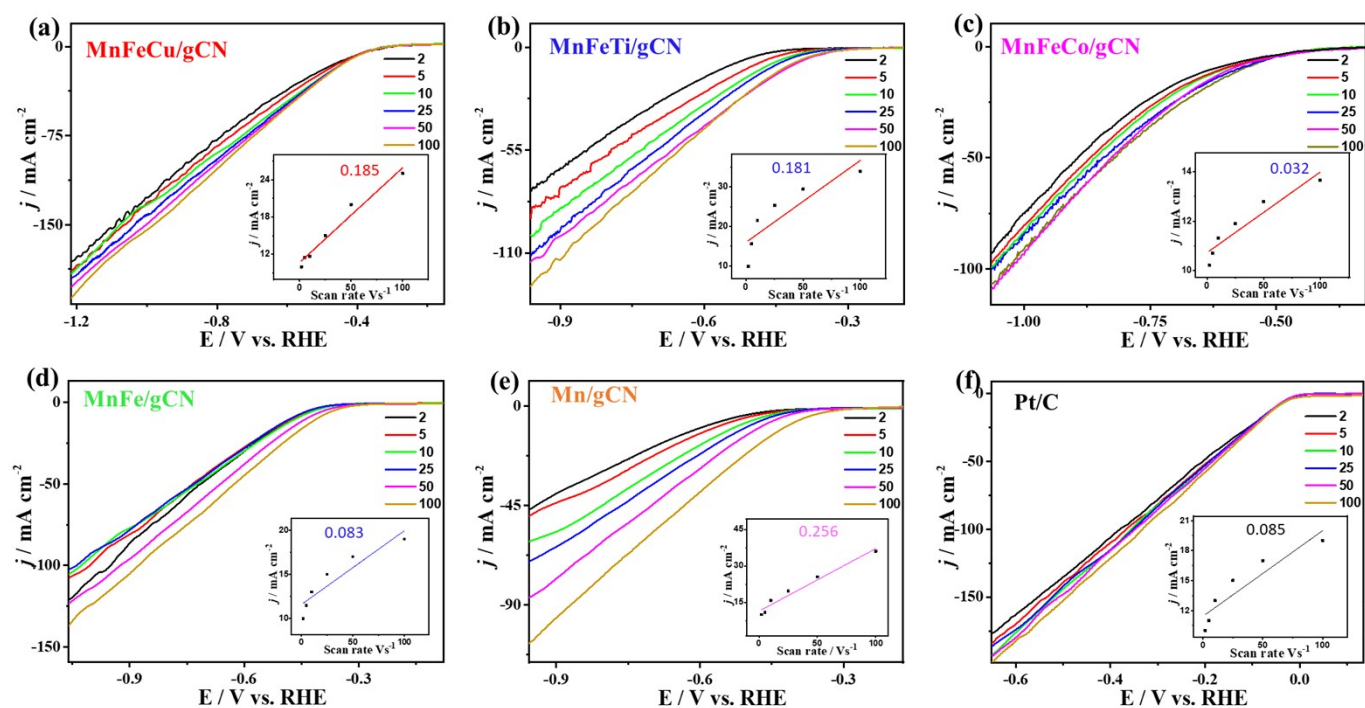

Figure S7. LSV measured at different scan rates tested on MnFeCu/g-C<sub>3</sub>N<sub>4</sub>, MnFeTi/g-C<sub>3</sub>N<sub>4</sub>, MnFeCo/g-C<sub>3</sub>N<sub>4</sub>, MnFe/g-C<sub>3</sub>N<sub>4</sub>, Mn/g-C<sub>3</sub>N<sub>4</sub>, and Pt/C catalyst in 0.5 M H<sub>2</sub>SO<sub>4</sub> electrolyte.

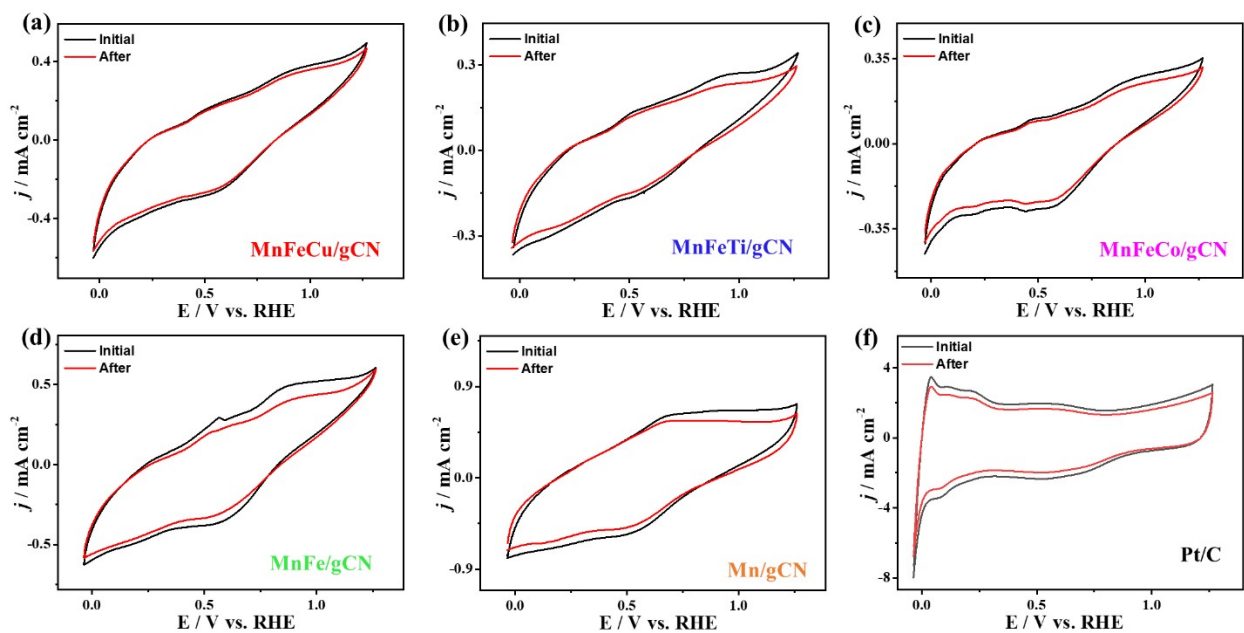

**Figure S8.** CV curve at scan rate  $50 \text{ mV s}^{-1}$  in  $0.5 \text{ M H}_2\text{SO}_4$  purged with  $\text{N}_2$  for catalysts before and after cyclic test.

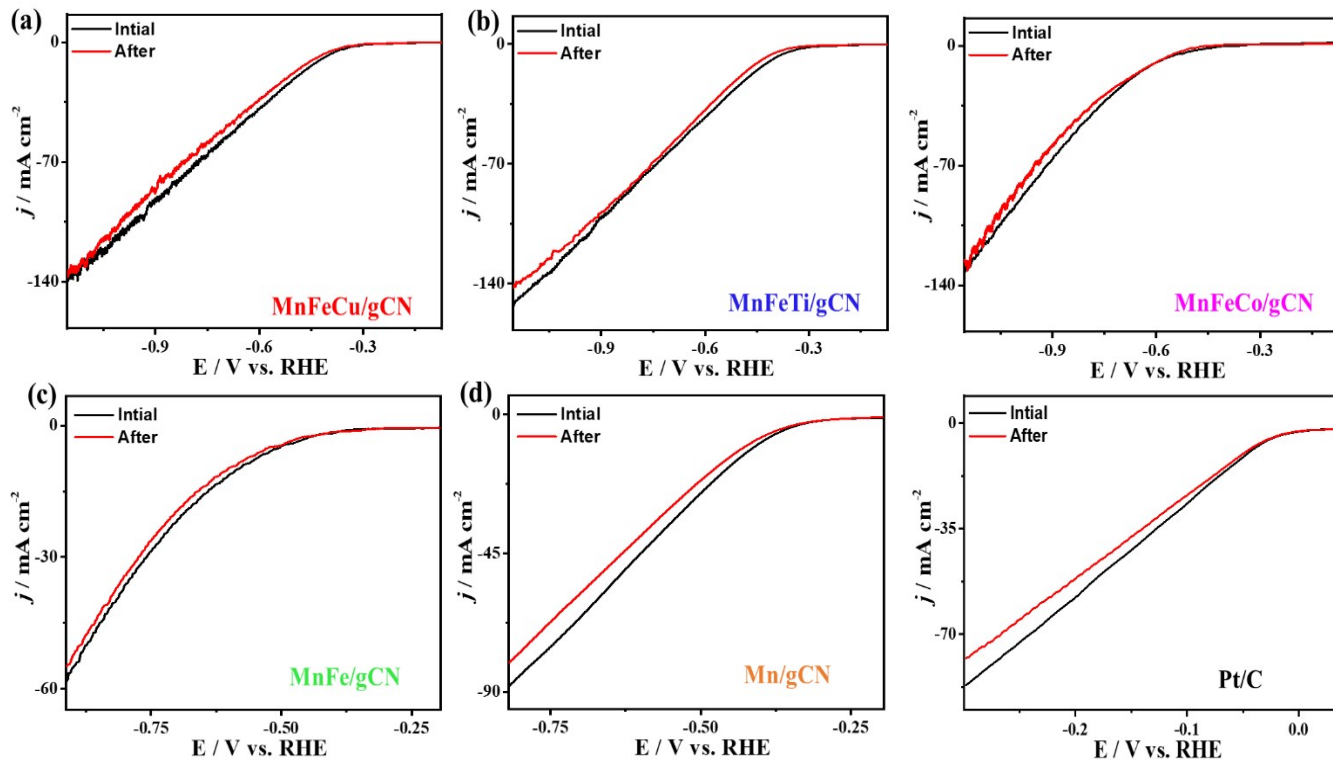

**Figure 9.** (a) LSV before and after 1000 cycles measured at scan rate  $2 \text{ mV s}^{-1}$  tested on MnFeCu/g- $\text{C}_3\text{N}_4$ , MnFeTi/g- $\text{C}_3\text{N}_4$ , MnFeCo/g- $\text{C}_3\text{N}_4$ , MnFe/g- $\text{C}_3\text{N}_4$ , Mn/g- $\text{C}_3\text{N}_4$ , and Pt/C catalyst in  $0.5 \text{ M H}_2\text{SO}_4$  electrolyte.

**Table S4** Comparison of the HER activity of our developed MnFeCu/g-C<sub>3</sub>N<sub>4</sub> and previous reported carbon-based catalysts in acidic electrolytes.

| Catalyst                               | Onset Potential (V vs. RHE) (mV) | $\eta_{10}$ (V vs. RHE)(mV) | Tafel slope [mV dec <sup>-1</sup> ] | TOF  | Electrolyte                          | Ref.      |
|----------------------------------------|----------------------------------|-----------------------------|-------------------------------------|------|--------------------------------------|-----------|
| MnFeCu/g-C <sub>3</sub> N <sub>4</sub> | -225                             | 400                         | 219                                 | 3.5  | 0.5 M H <sub>2</sub> SO <sub>4</sub> | This Work |
| N,P graphene-1                         | 289                              | 422                         | 91                                  | -    | 0.5 M H <sub>2</sub> SO <sub>4</sub> | 41        |
| NENU-501                               | 150                              | 397                         | 137                                 | -    | 0.5 M H <sub>2</sub> SO <sub>4</sub> | 42        |
| CTGU-6                                 | 349                              | 425                         | 176                                 | -    | 0.5 M H <sub>2</sub> SO <sub>4</sub> | 43        |
| Cu-Pd/NPCC/HT/GCE                      | 82                               | 340                         | -                                   | -    | 0.5 M H <sub>2</sub> SO <sub>4</sub> | 44        |
| N-doped graphene                       | -345                             | 474                         | 172                                 | -    | 0.5 M H <sub>2</sub> SO <sub>4</sub> | 45        |
| 5% F/BCN                               | -144                             | 437                         | 153                                 | 0.92 | 0.5 M H <sub>2</sub> SO <sub>4</sub> | 46        |

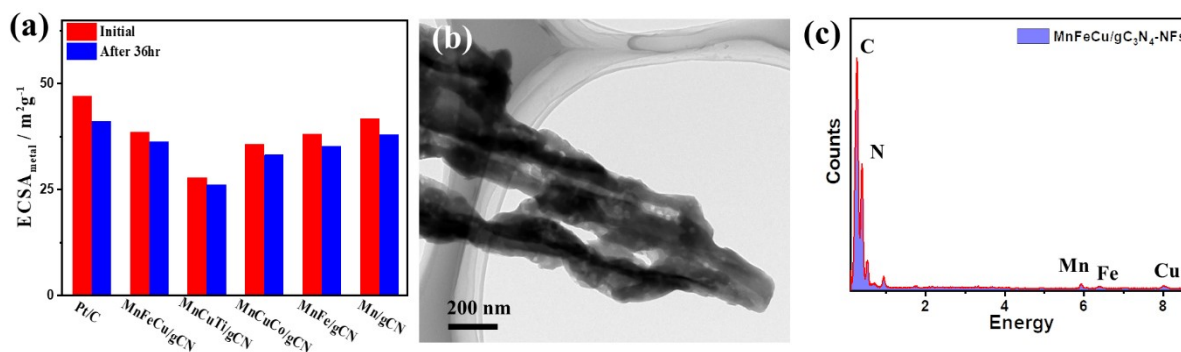

**Figure S10.** (a) ECSA before and after stability test , (b) TEM, and (c) EDX of MnFeCu/g-C<sub>3</sub>N<sub>4</sub> after stability test.

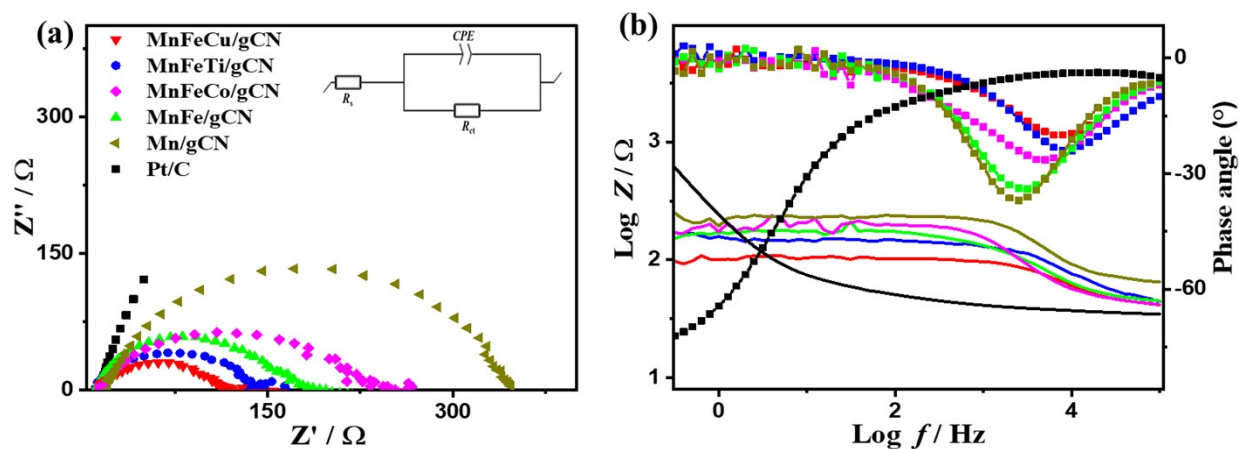

**Figure S11.** (a) Nyquist plots including (Voigt electrical equivalent circuit), and (b) Bode plots of MnFeCu/g-C<sub>3</sub>N<sub>4</sub>, MnFeTi/g-C<sub>3</sub>N<sub>4</sub>, MnFeCo/g-C<sub>3</sub>N<sub>4</sub>, MnFe/g-C<sub>3</sub>N<sub>4</sub>, Mn/g-C<sub>3</sub>N<sub>4</sub>, and Pt/C catalyst in 0.5 M H<sub>2</sub>SO<sub>4</sub> electrolyte

**Table S5** EIS fitting data of the as-made catalysts relative to Pt/C

| Catalyst | $R_s$ ( $\Omega$ ) | $R_{ct}$ ( $\Omega$ ) | CPE ( $\mu\text{F}\cdot\text{s}^{(1-\alpha)}$ ) | $\alpha$ |
|----------|--------------------|-----------------------|-------------------------------------------------|----------|
|          |                    |                       |                                                 |          |

|                                            |              |           |              |               |
|--------------------------------------------|--------------|-----------|--------------|---------------|
| MnFeCu/g-C <sub>3</sub> N <sub>4</sub> NFs | 41.4 ± 0.8   | 58 ± 0.15 | 1.94 ± 0.19  | 0.863 ± 0.013 |
| MnFeTi/g-C <sub>3</sub> N <sub>4</sub> NFs | 41.9 ± 1.3   | 265 ± 7.8 | 1.6 ± 0.695  | 0.851 ± 0.04  |
| MnFeCo/g-C <sub>3</sub> N <sub>4</sub> NFs | 43.8 ± 0.07  | 107 ± 0.2 | 1.13 ± 0.09  | 0.838 ± 0.015 |
| MnFe/g-C <sub>3</sub> N <sub>4</sub> NFs   | 44 ± 0.023   | 159 ± 2.1 | 2 ± 0.003    | 894 ± 0.003   |
| Mn/g-C <sub>3</sub> N <sub>4</sub> NFs     | 53.8 ± 1.69  | 132 ± 1.2 | 0.796 ± 27   | 0.801 ± 0.01  |
| Pt/C (10 wt.%)                             | 11.89 ± 0.06 | 171.1 ±   | 1.01 ± 0.001 | 0.763 ± 0.02  |

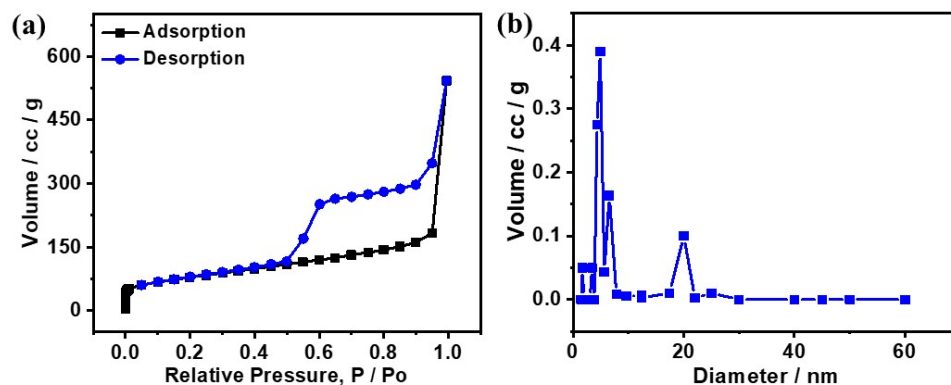

**Figure S12.** (a) N<sub>2</sub>-physisorption isotherms and (b) pore size/volume of MnFeCu/g-C<sub>3</sub>N<sub>4</sub>. The N<sub>2</sub>-physisorption isotherms were conducted on a Quantachrome Autosorb 3.01 instrument, and samples were degassed for 24 h at 50 °C under vacuum before the measurements.

## References

1. K. Eid, M. H. Sliem, A. S. Eldesoky, H. Al-Kandari and A. M. Abdullah, *International Journal of Hydrogen Energy*, 2019, **44**, 17943-17953.
2. K. Eid, M. H. Sliem, K. Jlassi, A. S. Eldesoky, G. G. Abdo, S. Y. Al-Qaradawi, M. A. Sharaf, A. M. Abdullah and A. A. Elzatahry, *Inorganic Chemistry Communications*, 2019, **107**, 107460.
3. K. Eid, M. H. Sliem and A. M. Abdullah, *Nanoscale*, 2019, **11**, 11755-11764.
4. K. Eid, Y. H. Ahmad, A. T. Mohamed, A. G. Elsafty and S. Y. Al-Qaradawi, *Catalysts*, 2018, **8**, 411.
5. K. Eid, M. H. Sliem, H. Al-Kandari, M. A. Sharaf and A. M. Abdullah, *Langmuir*, 2019, **35**, 3421-3431.
6. K. Eid, M. H. Sliem, M. Al-Ejji, A. M. Abdullah, M. Harfouche and R. S. Varma, *ACS Applied Materials & Interfaces*, 2022, **14**, 40749-40760.
7. A. Abdelgawad, B. Salah, Q. Lu, A. M. Abdullah, M. Chitt, A. Ghanem, R. S. Al-Hajri and K. Eid, *Journal of Electroanalytical Chemistry*, 2023, **938**, 117426.
8. Y. Wang, X. Liu, J. Liu, B. Han, X. Hu, F. Yang, Z. Xu, Y. Li, S. Jia and Z. Li, *Angewandte Chemie*, 2018, **130**, 5867-5873.
9. Y. Zheng, L. Lin, X. Ye, F. Guo and X. Wang, *Angewandte Chemie*, 2014, **126**, 12120-12124.
10. X. Wang, C. Zhou, R. Shi, Q. Liu, G. I. Waterhouse, L. Wu, C.-H. Tung and T. Zhang, *Nano Research*, 2019, **12**, 2385-2389.
11. X. Fan, T. Wang, B. Gao, H. Gong, H. Xue, H. Guo, L. Song, W. Xia, X. Huang and J. He, *Langmuir*, 2016, **32**, 13322-13332.

12. Z. Yu, Y. Li, J. Qu, R. Zheng, J. M. Cairney, J. Zhang, M. Zhu, A. Khan and W. Li, *Chemical Engineering Journal*, 2021, **404**, 126458.
13. J. Sun, S. Yang, Z. Liang, X. Liu, P. Qiu, H. Cui and J. Tian, *Journal of colloid and interface science*, 2020, **567**, 300-307.
14. W. Peng, S.-S. Zhang, Y.-B. Shao and J.-H. Huang, *International Journal of Hydrogen Energy*, 2018, **43**, 22215-22225.
15. Z. Qin, F. Xue, Y. Chen, S. Shen and L. Guo, *Applied Catalysis B: Environmental*, 2017, **217**, 551-559.
16. T. Bhowmik, M. K. Kundu and S. Barman, *ACS applied materials & interfaces*, 2016, **8**, 28678-28688.
17. Y. Zhao, F. Zhao, X. Wang, C. Xu, Z. Zhang, G. Shi and L. Qu, *Angewandte Chemie International Edition*, 2014, **53**, 13934-13939.
18. K.-L. Chen, S.-S. Zhang, J.-Q. Yan, W. Peng, D.-P. Lei and J.-H. Huang, *International Journal of Hydrogen Energy*, 2019, **44**, 31916-31929.
19. J. Yang, Y. Liang, K. Li, G. Yang, K. Wang, R. Xu and X. Xie, *Catalysis Science & Technology*, 2019, **9**, 3342-3346.
20. X. Zhao, Y. Zhang, X. Zhao, X. Wang, Y. Zhao, H. Tan, H. Zhu, W. Ho, H. Sun and Y. Li, *ACS applied materials & interfaces*, 2019, **11**, 27934-27943.
21. J. Bai, Q. Han, Z. Cheng and L. Qu, *Chemistry—An Asian Journal*, 2018, **13**, 3160-3164.
22. Y. Wang, S. Zhao, Y. Zhang, J. Fang, W. Chen, S. Yuan and Y. Zhou, *ACS Sustainable Chemistry & Engineering*, 2018, **6**, 10200-10210.
23. G. Ge, X. Guo, C. Song and Z. Zhao, *ACS applied materials & interfaces*, 2018, **10**, 18746-18753.
24. Y. Gao, F. Hou, S. Hu, B. Wu, Y. Wang, H. Zhang, B. Jiang and H. Fu, *ChemCatChem*, 2018, **10**, 1330-1335.
25. Z. Sun, W. Wang, Q. Chen, Y. Pu, H. He, W. Zhuang, J. He and L. Huang, *Journal of Materials Chemistry A*, 2020, **8**, 3160-3167.
26. S. Guo, Z. Deng, M. Li, B. Jiang, C. Tian, Q. Pan and H. Fu, *Angewandte Chemie International Edition*, 2016, **55**, 1830-1834.
27. Z. Mo, H. Xu, Z. Chen, X. She, Y. Song, J. Wu, P. Yan, L. Xu, Y. Lei and S. Yuan, *Applied Catalysis B: Environmental*, 2018, **225**, 154-161.
28. G. Zhang, A. Savateev, Y. Zhao, L. Li and M. Antonietti, *Journal of Materials Chemistry A*, 2017, **5**, 12723-12728.
29. Y. Zhu, A. Marianov, H. Xu, C. Lang and Y. Jiang, *ACS applied materials & interfaces*, 2018, **10**, 9468-9477.
30. Z. Huang, F. Li, B. Chen and G. Yuan, *RSC advances*, 2015, **5**, 102700-102706.
31. D. Long, W. Chen, S. Zheng, X. Rao and Y. Zhang, *Industrial & Engineering Chemistry Research*, 2020, **59**, 4549-4556.
32. H. Li, X. Bao, Z. Wang, Z. Zheng, P. Wang, Y. Liu, X. Zhang, X. Qin, Y. Dai and Y. Li, *International Journal of Hydrogen Energy*, 2019, **44**, 28780-28788.
33. S. Guo, Y. Tang, Y. Xie, C. Tian, Q. Feng, W. Zhou and B. Jiang, *Applied Catalysis B: Environmental*, 2017, **218**, 664-671.
34. X. Liu, X. Wu, D. Long, X. Rao and Y. Zhang, *Journal of Photochemistry and Photobiology A: Chemistry*, 2020, **391**, 112337.
35. G. Ge and Z. Zhao, *Catalysis Science & Technology*, 2019, **9**, 266-270.
36. W. Wang, Z. Shu, J. Zhou, T. Li, P. Duan, Z. Zhao, Y. Tan, C. Xie and S. Cui, *Applied Clay Science*, 2018, **158**, 143-149.
37. S. Kang, J. Jang, S.-h. Ahn and C. S. Lee, *Dalton Transactions*, 2019, **48**, 2170-2178.

38. J. Zhang, M. Wu, B. He, R. Wang, H. Wang and Y. Gong, *Applied Surface Science*, 2019, **470**, 565-572.
39. Y. Zeng, X. Liu, C. Liu, L. Wang, Y. Xia, S. Zhang, S. Luo and Y. Pei, *Applied Catalysis B: Environmental*, 2018, **224**, 1-9.
40. P. Wang, I. Sinev, F. Sun, H. Li, D. Wang, Q. Li, X. Wang, R. Marschall and M. Wark, *RSC Advances*, 2017, **7**, 42774-42782.
41. Y. Zheng, Y. Jiao, L. H. Li, T. Xing, Y. Chen, M. Jaroniec and S. Z. J. A. n. Qiao, 2014, **8**, 5290-5296.
42. J.-S. Qin, D.-Y. Du, W. Guan, X.-J. Bo, Y.-F. Li, L.-P. Guo, Z.-M. Su, Y.-Y. Wang, Y.-Q. Lan and H.-C. J. J. o. t. A. C. S. Zhou, 2015, **137**, 7169-7177.
43. Y. P. Wu, W. Zhou, J. Zhao, W. W. Dong, Y. Q. Lan, D. S. Li, C. Sun and X. J. A. C. Bu, 2017, **129**, 13181-13185.
44. S. Mandegarzad, J. B. Raoof, S. R. Hosseini and R. J. A. S. S. Ojani, 2018, **436**, 451-459.
45. Y. Ito, W. Cong, T. Fujita, Z. Tang and M. J. A. C. I. E. Chen, 2015, **54**, 2131-2136.
46. M. A. Ahsan, T. He, K. Eid, A. M. Abdullah, M. L. Curry, A. Du, A. R. Puente Santiago, L. Echegoyen and J. C. J. J. o. t. A. C. S. Noveron, 2021, **143**, 1203-1215.
